# Supplementary material for: An efficient mixed-valence copper pyrazolate catalyst for the conversion of carbon dioxide and epoxides into cyclic carbonates
Source: Royal Society of Chemistry journal article supplement (doi:10.1039/d3dt00844d), 2023-01-01
Supplement: d3dt00844d1.pdf [file d3dt00844d1.pdf]

## Electronic Supplementary Information

### **An efficient mixed-valence copper pyrazolate catalyst for the conversion of carbon dioxide and epoxides into cyclic carbonates**

Jian-Ge Wang,<sup>‡a</sup> Yang Liu,<sup>‡b</sup> Chun-Mei Liu,<sup>a</sup> Jing-Huo Chen<sup>\*a</sup> and Guang Yang<sup>\*a</sup>

<sup>a</sup>Green Catalysis Center, and College of Chemistry, Zhengzhou University, Zhengzhou, Henan, 450001, China.

<sup>b</sup>Henan Technician College of Medicine and Health, Kaifeng, Henan, 475000, China.

<sup>‡</sup>These authors contributed equally.

\*Corresponding author.

E-mail address: [jhchen@zzu.edu.cn](mailto:jhchen@zzu.edu.cn); [yang@zzu.edu.cn](mailto:yang@zzu.edu.cn)

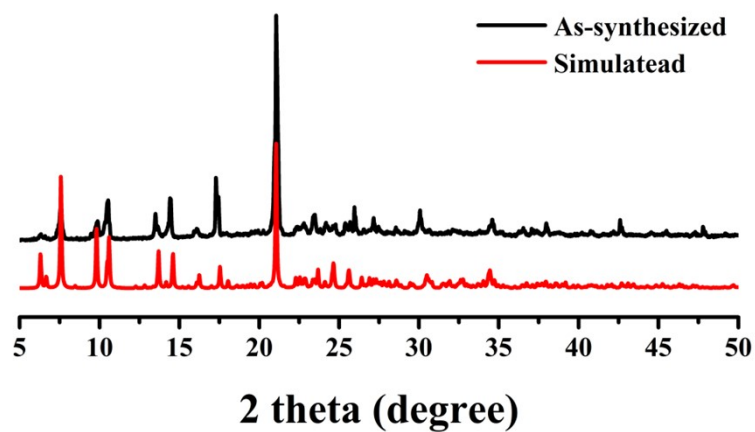

**Figure S1.** The P-XRD patterns of **1** obtained from the as-synthesized sample (black line) and the simulation based on the crystal data (red line).

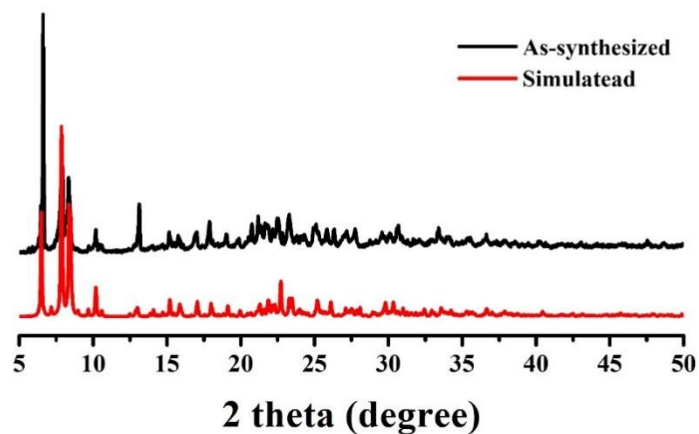

**Figure S2.** The P-XRD patterns of **2** obtained from the as-synthesized sample (black line) and the simulation based on the crystal data (red line).

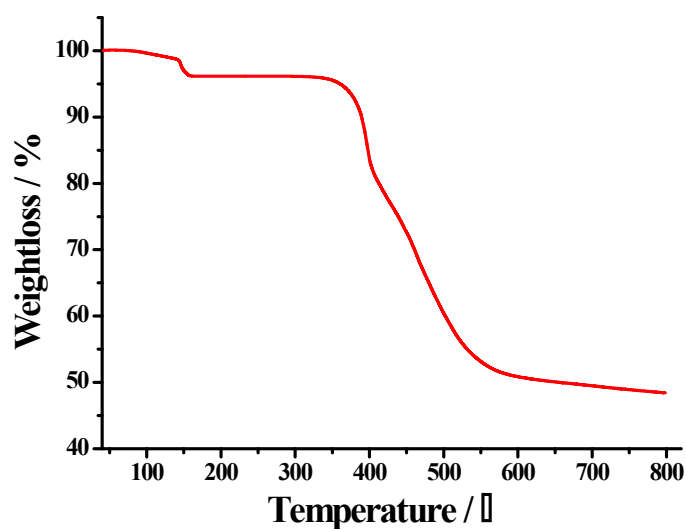

**Figure S3.** Thermogravimetric curve of **1**.

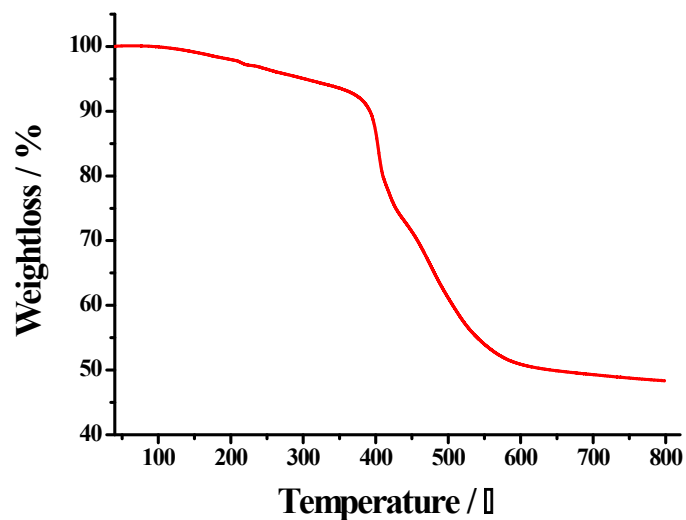

Figure S4. Thermogravimetric curve of 2.

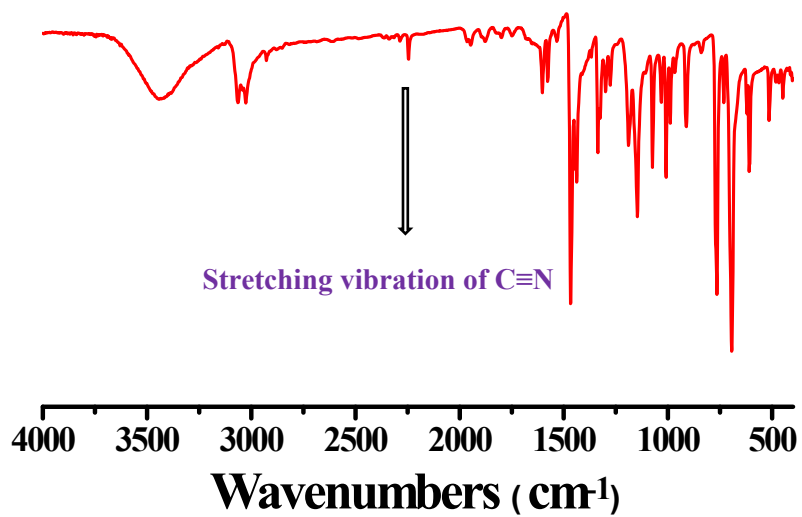

Figure S5. IR spectrum of 1 as KBr pellet.

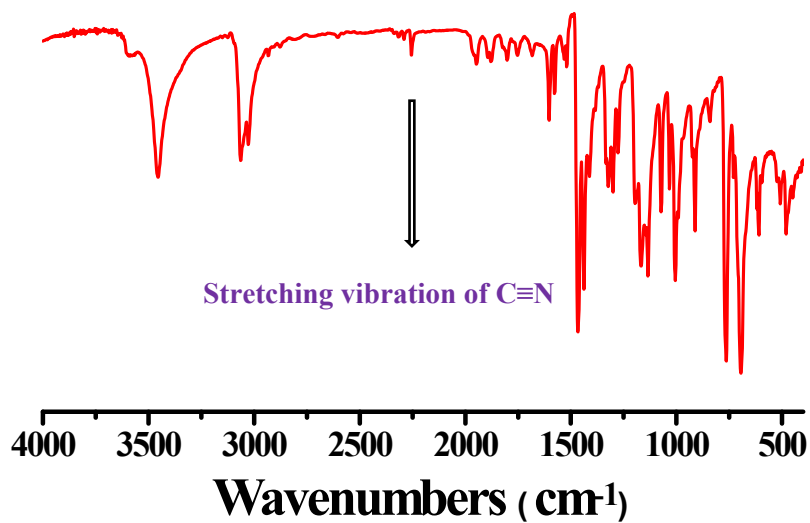

Figure S6. IR spectrum of 2 as KBr pellet.

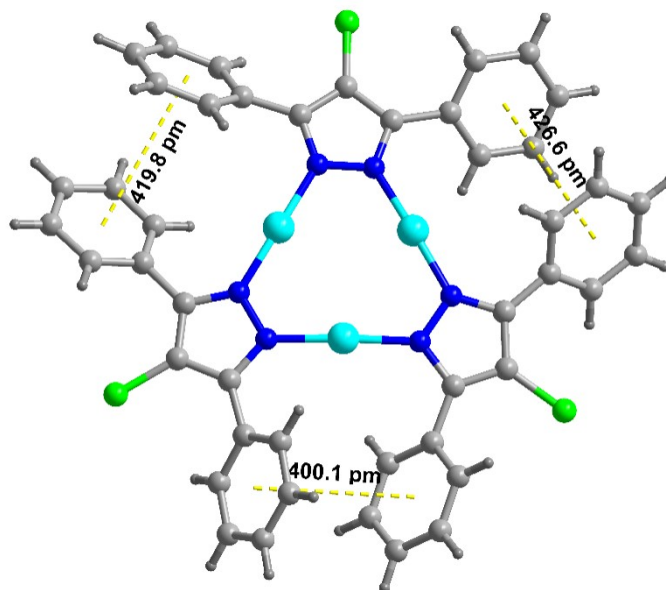

**Figure S7.** The intramolecular  $\pi(\text{Ph})\cdots\pi(\text{Ph})$  interaction in **1**,  $\text{CH}_3\text{CN}$  molecule has been omitted for clarity. Colour code: Cu, turquoise; N, blue; C, light grey; H, dark grey; Cl, bright green.

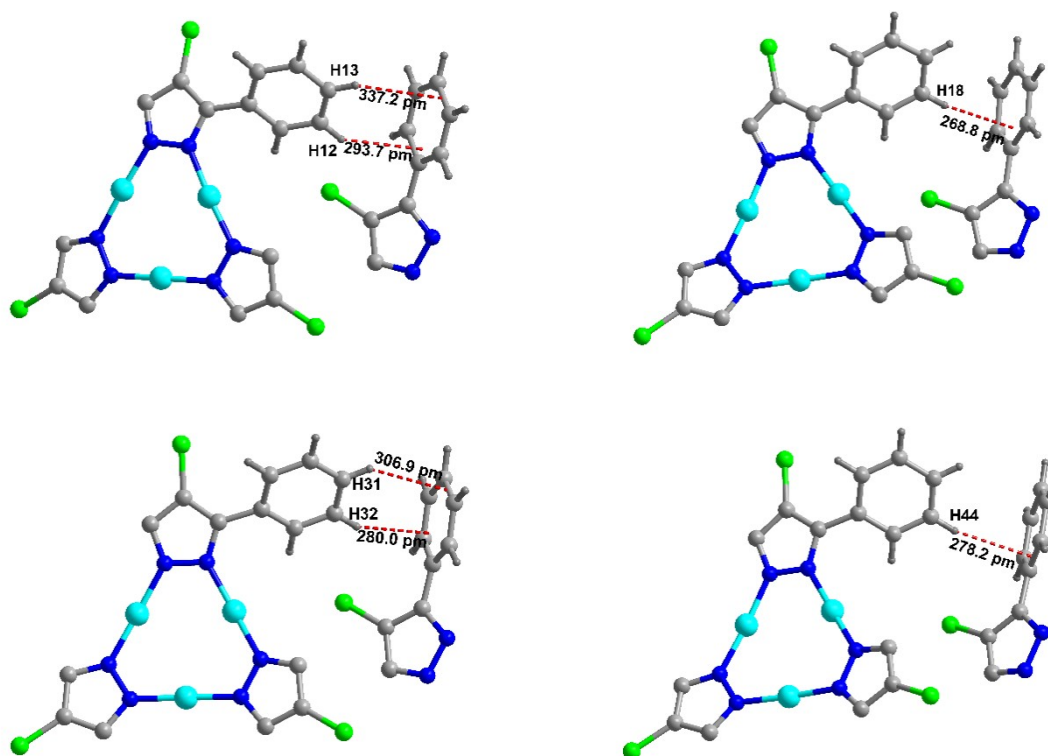

**Figure S8.** The intermolecular  $\text{C-H}\cdots\pi(\text{Ph})$  interaction in **1**,  $\text{CH}_3\text{CN}$  molecule and some phenyl groups have been omitted for clarity. Colour code: Cu, turquoise; O, red; N, blue; C, light grey; H, dark grey; Cl, bright green.

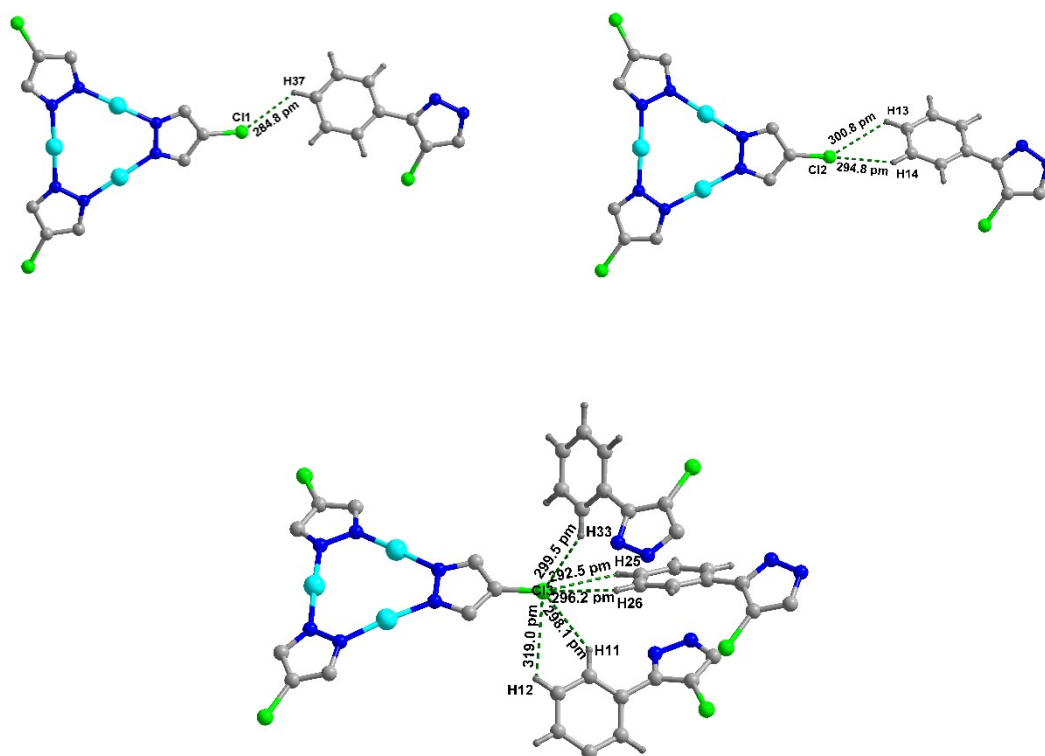

**Figure S9.** The intermolecular Cl $\cdots$ H(Ph) interactions in **1**, CH<sub>3</sub>CN molecule and some phenyl groups have been omitted for clarity. Colour code: Cu, turquoise; N, blue; C, light grey; H, dark grey; Cl, bright green.

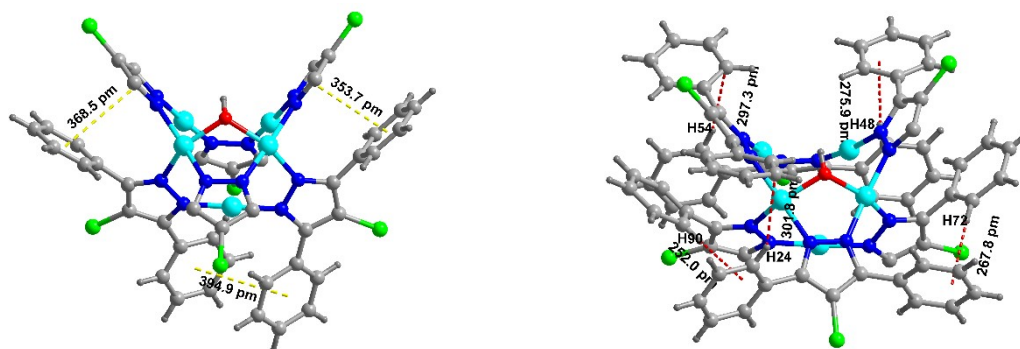

**Figure S10.** The intramolecular  $\pi(\text{Ph})\cdots\pi(\text{Ph})$  interaction and C-H $\cdots\pi(\text{Ph})$  interaction in **2**, CH<sub>3</sub>CN molecule and some phenyl groups have been omitted for clarity. Colour code: Cu, turquoise; O, red; N, blue; C, light grey; H, dark grey; Cl, bright green.

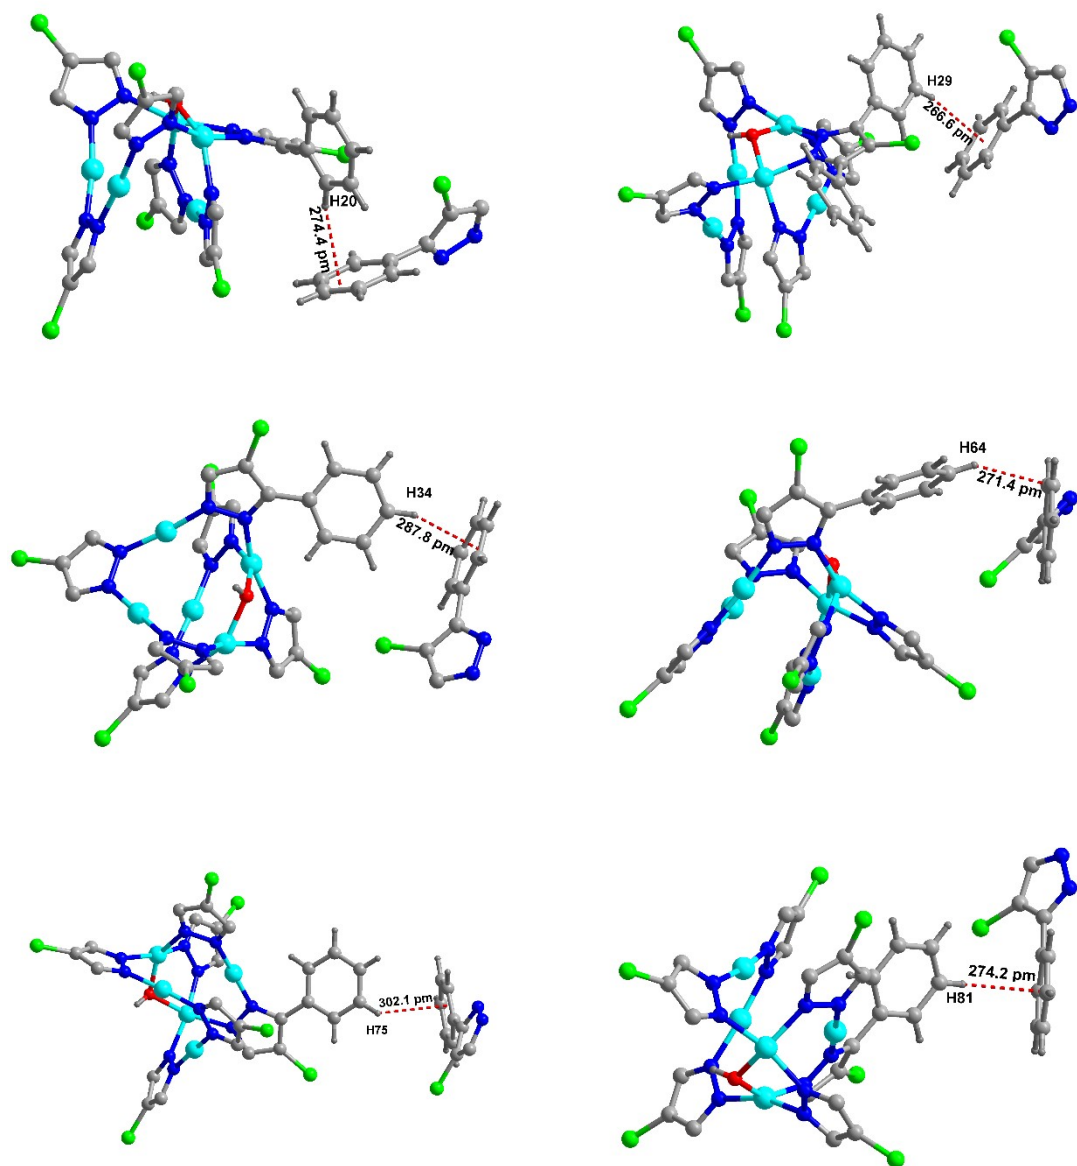

**Figure S11.** The intermolecular C-H... $\pi$ (Ph) interaction in **2**, CH<sub>3</sub>CN molecule and some phenyl groups have been omitted for clarity. Colour code: Cu, turquoise; O, red; N, blue; C, light grey; H, dark grey; Cl, bright green.

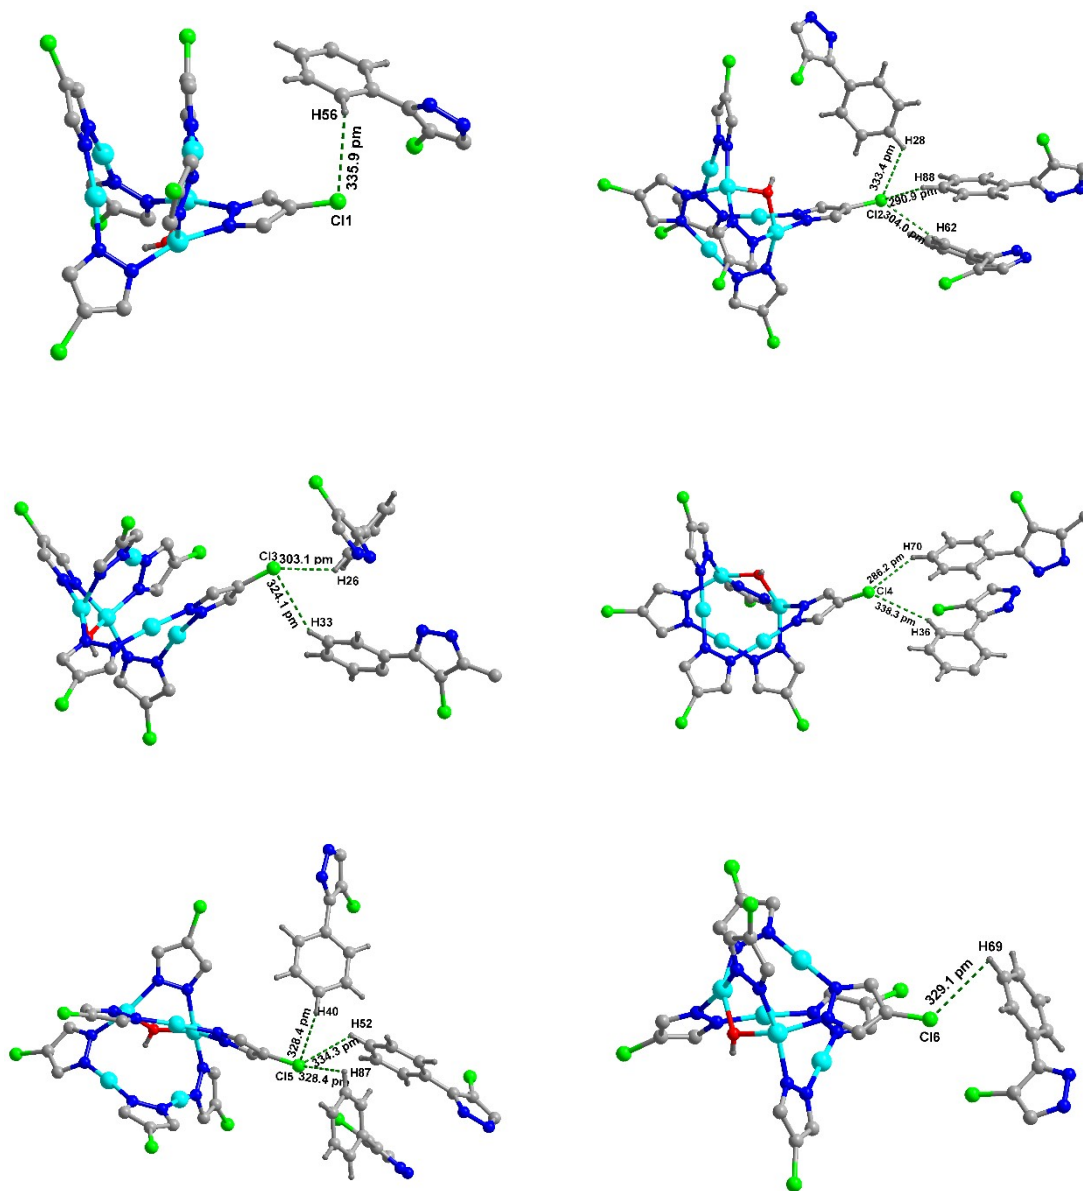

**Figure S12.** The intermolecular Cl...H(Ph) interactions in **2**, CH<sub>3</sub>CN molecule and some phenyl groups have been omitted for clarity. Colour code: Cu, turquoise; O, red; N, blue; C, light grey; H, dark grey; Cl, bright green.

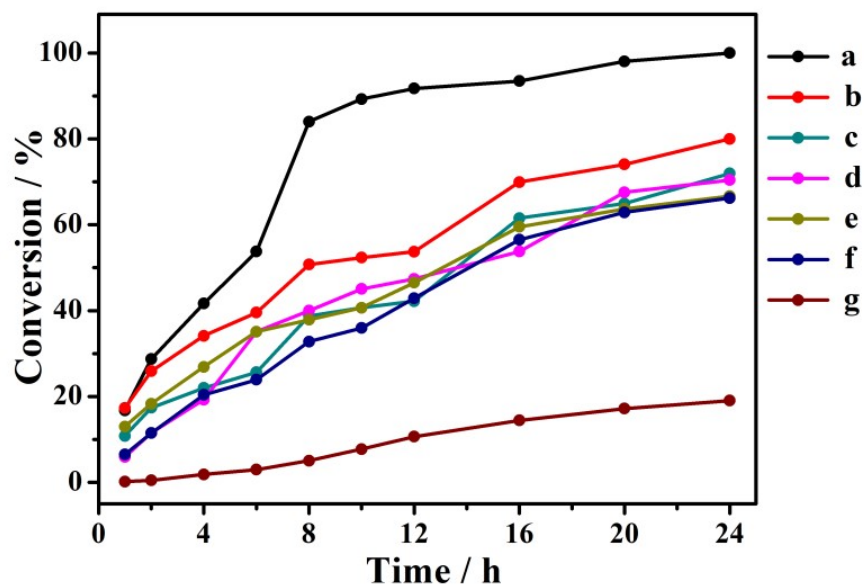

**Figure S13.** The curves of reaction conversion rate for the formation of propylene carbonate versus time. Reaction conditions: CO<sub>2</sub> (1 atm, using a balloon), propylene oxide (25.0 mmol) with **2** and TBAB (Bu<sub>4</sub>NBr) as catalysts at 25°C, a: **2** (0.15 mmol), TATB (1.8 mmol); b: **2** (0.1 mmol), TATB (1.8 mmol); c: **2** (0.05 mmol), TATB (1.8 mmol); d: **2** (0.025 mmol), TATB (1.8 mmol); e: **2** (0.15 mmol), TATB (1.2 mmol); f: **2** (0.15 mmol), TATB (0.6 mmol); g: **2** (0 mmol), TATB (1.8 mmol).

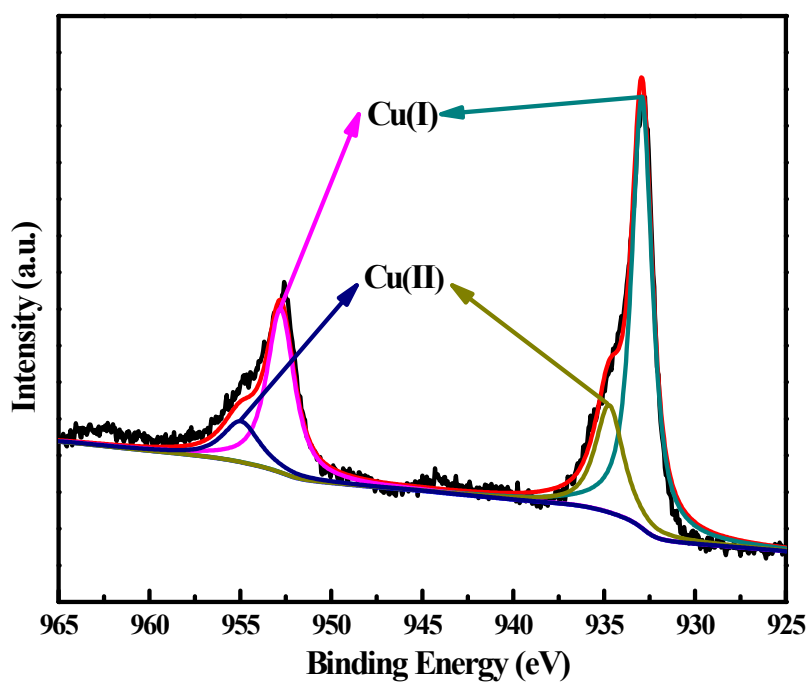

**Figure S14.** Cu 2p XPS spectrum of **1**.



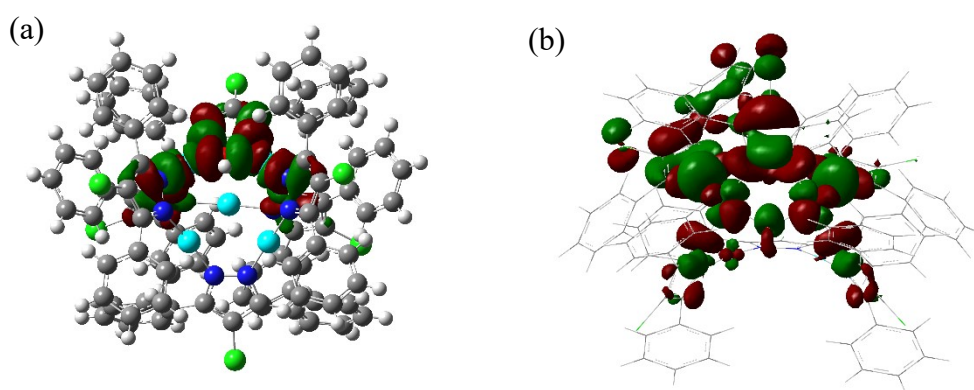

**Figure S15.** The LUMO and HOMO of **2** obtained by DFT calculation.

**Table S1.** Selected bond distances (Å) and bond angles (°) for **1** and **2**.

| <b>1</b>                   |            |                            |            |
|----------------------------|------------|----------------------------|------------|
| Cu(1)-N(2)                 | 1.883(2)   | Cu(1)-N(3)                 | 1.883(2)   |
| Cu(2)-N(4)                 | 1.879(2)   | Cu(2)-N(6)                 | 1.878(2)   |
| Cu(3)-N(1)                 | 1.868(2)   | Cu(3)-N(6)                 | 1.871(2)   |
| N(2)-Cu(1)-N(3)            | 174.49(10) | N(4)-Cu(1)-N(5)            | 173.48(10) |
| N(1)-Cu(1)-N(6)            | 174.57(10) | Cu(1)···N≡CCH <sub>3</sub> | 2.783(3)   |
| Cu(2)···N≡CCH <sub>3</sub> | 2.853(3)   | Cu(3)···N≡CCH <sub>3</sub> | 2.830(3)   |
| <b>2</b>                   |            |                            |            |
| Cu(1)-O(1)                 | 1.902(4)   | Cu(1)-N(1)                 | 1.978(5)   |
| Cu(1)-N(8)                 | 1.958 (5)  | Cu(1)-N(12)                | 1.985(5)   |
| Cu(2)-O(1)                 | 1.909(4)   | Cu(2)-N(2)                 | 1.968(5)   |
| Cu(2)-N(3)                 | 1.954(5)   | Cu(2)-N(9)                 | 1.983(5)   |
| Cu(3)-N(4)                 | 1.860(5)   | Cu(3)-N(5)                 | 1.867(5)   |
| Cu(4)-N(6)                 | 1.862(5)   | Cu(4)-N(7)                 | 1.865(5)   |
| Cu(5)-N(10)                | 1.874(5)   | Cu(5)-N(11)                | 1.855(5)   |
| O(1)-Cu(1)-N(1)            | 84.53(19)  | O(1)-Cu(1)-N(8)            | 94.03(19)  |
| O(1)-Cu(1)-N(12)           | 146.3(2)   | N(1)-Cu(1)-N(8)            | 161.9(2)   |
| N(1)-Cu(1)-N(12)           | 95.3(2)    | N(8)-Cu(1)-N(12)           | 95.9(2)    |
| O(1)-Cu(2)-N(2)            | 84.41(19)  | O(1)-Cu(2)-N(3)            | 91.87(19)  |
| O(1)-Cu(2)-N(9)            | 151.42(19) | N(2)-Cu(2)-N(3)            | 164.4(2)   |
| N(2)-Cu(2)-N(9)            | 95.2(2)    | N(3)-Cu(2)-N(9)            | 95.3(2)    |
| N(4)-Cu(3)-N(5)            | 172.0(2)   | N(6)-Cu(4)-N(7)            | 175.9(2)   |
| N(10)-Cu(5)-N(11)          | 176.3(2)   | Cu(1)-O(1)-Cu(2)           | 112.7(2)   |

**Table S2.** Comparison of structural parameters of Cu<sup>II</sup>-O-Cu<sup>II</sup> motifs.

| Structural motif                                                                  | Distance (Å)                         |                     | Bond angles (°)                      | CCDC code | Ref.       |
|-----------------------------------------------------------------------------------|--------------------------------------|---------------------|--------------------------------------|-----------|------------|
|                                                                                   | Cu <sup>II</sup> ...Cu <sup>II</sup> | Cu <sup>II</sup> -O | Cu <sup>II</sup> -O-Cu <sup>II</sup> |           |            |
| 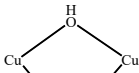 | 3.173                                | 1.902; 1.909        | 112.7                                | 1975110   | This paper |
|                                                                                   | 3.448                                | 1.991; 1.999        | 119.6                                | 161798    | 1          |
|  | 3.257-3.406                          | 1.886-1.945         | 116.5-125.3                          | 2117298   | 2          |
|                                                                                   | 3.282                                | 1.913; 1.918        | 118.0                                | 666709    | 3          |
|  | 3.417; 3.362                         | 1.936-1.950         | 119.6; 123.5                         | 1020049   | 4          |
|                                                                                   | 3.357                                | 1.908; 1.913        | 123.0                                | 2045673   | 5          |
|  | 3.227                                | 1.932; 1.939        | 112.9                                | 1827952   | 6          |
|                                                                                   | 3.199                                | 1.908; 1.910        | 113.9                                | 1825437   | 7          |
|  | 3.213                                | 1.902; 1.920        | 114.4                                | 1007288   | 8          |
|                                                                                   | 3.331                                | 1.913; 1.880        | 122.9                                | 2064099   | 9          |

**Table S3.** Comparison of the catalytic activity of **2** with previously reported homogeneous catalysts in the cycloaddition of CO<sub>2</sub> with propylene oxide.

| Entry | Catalyst                                                                                               | Co-catalyst                               | Pressure | Temp   | Time (h) | Yield (%) | Ref.       |
|-------|--------------------------------------------------------------------------------------------------------|-------------------------------------------|----------|--------|----------|-----------|------------|
| 1     | <b>2</b>                                                                                               | TBAB                                      | 1 atm    | R.T.   | 24       | 99        | This paper |
| 2     | Mo <sub>2</sub> (O <sup>t</sup> Bu) <sub>6</sub>                                                       | TBAB                                      | 1 atm    | R.T.   | 24       | 98        | 10         |
| 3     | [Cu <sub>6</sub> (μ <sub>4</sub> -O) <sub>2</sub> (SO <sub>4</sub> ) <sub>4</sub> (DMA) <sub>6</sub> ] | TBAB                                      | 1 atm    | R.T.   | 24       | 98        | 11         |
| 4     | (salen)CoI                                                                                             | 2-(Triphenylphosphorylidene)-acetaldehyde | 1 atm    | R.T.   | 24       | 90        | 12         |
| 5     | [urea-Zn]I <sub>2</sub>                                                                                |                                           | 1.5 MPa  | 120 °C | 3.0      | 95        | 13         |
| 6     | [AlMe <sub>2</sub> {κ <sub>2</sub> -mbpzbdcape}]I <sub>2</sub>                                         |                                           | 1 MPa    | 70 °C  | 18       | 78        | 14         |
| 7     | [Fe(BIP <sup>Prim</sup> )(dhbpy)]I                                                                     | Tetraphenylphosphonium iodide             | 0.5 MPa  | 50 °C  | 20       | 72        | 15         |
| 8     | [Heemim][ZrCl <sub>5</sub> ]                                                                           |                                           | 1 MPa    | 120 °C | 3        | 96        | 16         |
| 9     | [La{N(SiHMe <sub>2</sub> ) <sub>2</sub> } <sub>2</sub> {k <sub>3</sub> -bpzcp}]                        | TBAB                                      | 1 MPa    | 70 °C  | 16       | 95        | 17         |
| 10    | 1,8-diazabicyclo[5.4.0]-undec-7-ene                                                                    | Cellulose                                 | 20 atm   | 120 °C | 2        | 90        | 18         |

Abbreviations used:

salen: (1*E*,1'*E*)-*N,N'*-((1*R*,2*R*)-cyclohexane-1,2-diyl)bis(1-(3,5-di-*tert*-butyl-2-(1'-oxidaneyl)phenyl)methanimine)mbpzbdcape: 1,1'-(2,2-bis(4-(diethyl(methyl)-1<sup>4</sup>-azaneyl)phenyl)-2-(1'-oxidaneyl)ethane-1,1-diyl)bis(3,5-dimethyl-1*H*-pyrazole)BIP<sup>Prim</sup>: (1*E*,1'*E*)-1,1'-(4-(benzyloxy)pyridine-2,6-diyl)bis(*N*-(3-(1*H*-imidazole-1-yl)propyl)methanimine)

dhbpy: [2,2'-bipyridine]-6,6'-diol

Heemim: 1-[2-(2-hydroxyethoxy)ethyl]-3-methylimidazolium

Bpzcp: 2,2-bis(3,5-dimethylpyrazol-1-yl)-1,1-diphenylethylcyclopentadienyl

**NMR data for products:**

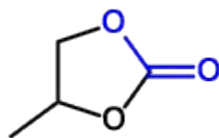

**4-methyl-1,3-dioxolan-2-one**

<sup>1</sup>H NMR (400 MHz, CDCl<sub>3</sub>): δ 4.86-4.80 (m, 1H), 4.54-4.51 (m, 1H), 4.01-3.98 (m, 1H), 1.45-1.44 (d, 3H) ppm;

<sup>13</sup>C NMR (101 MHz, CDCl<sub>3</sub>): δ 155.11, 73.64, 70.72, 19.40 ppm.

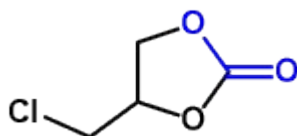

**4-(chloromethyl)-1,3-dioxolan-2-one**

<sup>1</sup>H NMR (300 MHz, CDCl<sub>3</sub>): δ 4.97 (s, 1H), 4.60-4.56 (t, 1H), 4.41-4.37 (t, 1H), 3.81-3.77 (dd, 1H), 3.73-3.70 (dd, 1H) ppm;

<sup>13</sup>C NMR (75 MHz, CDCl<sub>3</sub>): δ 154.36, 74.41, 67.04, 43.88 ppm.

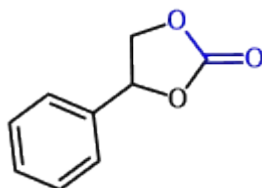

**4-phenyl-1,3-dioxolan-2-one**

<sup>1</sup>H NMR (300 MHz, CDCl<sub>3</sub>): δ 7.48-7.34 (m, 5H), 5.71-5.66 (t, 1H), 4.84-4.78 (t, 1H), 4.38-4.32 (t, 1H) ppm;

<sup>13</sup>C NMR (75 MHz, CDCl<sub>3</sub>): δ 154.20, 135.37, 129.35, 128.86, 125.52, 78.09, 71.33 ppm.

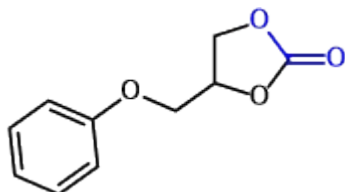

**4-(phenoxy)methyl-1,3-dioxolan-2-one**

<sup>1</sup>H NMR (300 MHz, CDCl<sub>3</sub>): δ 7.33-7.29 (t, 2H), 7.04-7.00 (t, 1H), 6.92-6.90 (d, 2H), 5.06-5.00 (m, 1H), 4.64-4.59 (t, 1H), 4.56-4.52 (t, 1H), 4.26-4.22 (dd, 1H), 4.16-4.13 (dd, 1H) ppm;

<sup>13</sup>C NMR (75 MHz, CDCl<sub>3</sub>): δ 157.85, 154.80, 129.82, 121.11, 114.71, 74.23, 66.96, 66.36 ppm.

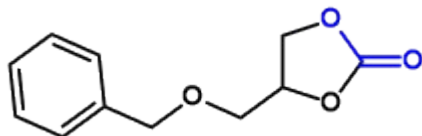

**4-((benzyloxy)methyl)-1,3-dioxolan-2-one**

$^1\text{H NMR}$  (300 MHz,  $\text{CDCl}_3$ ):  $\delta$  7.39-7.29 (m, 5H), 4.84-4.78 (m, 1H), 4.63-4.55 (m, 2H), 4.49-4.45 (t, 1H), 4.40-4.36 (m, 1H), 3.73-3.69 (dd, 1H), 3.63-3.59 (dd, 1H) ppm;

$^{13}\text{C NMR}$  (75 MHz,  $\text{CDCl}_3$ ):  $\delta$  155.06, 137.16, 128.67, 128.17, 127.84, 75.11, 73.77, 68.91, 66.38 ppm.

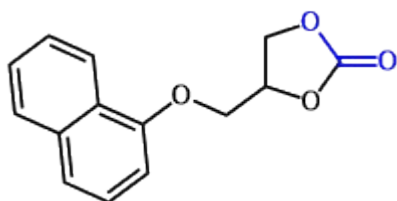

**4-((naphthalen-1-yloxy)methyl)-1,3-dioxolan-2-one**

$^1\text{H NMR}$  (400 MHz,  $\text{CDCl}_3$ ):  $\delta$  8.17-8.15 (t, 1H), 7.82-7.80 (t, 1H), 7.52-7.49 (m, 3H), 7.38-7.35 (t, 1H), 6.79-6.77 (d, 1H), 5.14 (s, 1H), 4.68-4.66 (m, 2H), 4.44-4.41 (dd, 1H), 4.29-4.26 (dd, 1H) ppm;

$^{13}\text{C NMR}$  (101 MHz,  $\text{CDCl}_3$ ):  $\delta$  154.88, 153.53, 134.64, 127.68, 126.02, 126.02, 125.60, 125.37, 121.82, 121.66, 104.98, 74.30, 67.38, 66.45 ppm.

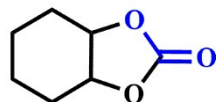

**Hexahydrobenzo[d][1,3]dioxol-2-one**

$^1\text{H NMR}$  (400 MHz,  $\text{CDCl}_3$ ):  $\delta$  4.66 (s, 2H), 1.86 (s, 4H), 1.59-1.54(m, 2H), 1.43-1.38 (m, 2H);

$^{13}\text{C NMR}$  (101 MHz,  $\text{CDCl}_3$ ):  $\delta$  155.45, 75.82, 26.76, 19.16 ppm.

# $^1\text{H}$ NMR and $^{13}\text{C}$ NMR Spectra of 4-Chloro-3,5-Diphenylpyrazole

$^1\text{H}$  NMR ( $\text{CDCl}_3$ , 400 MHz)

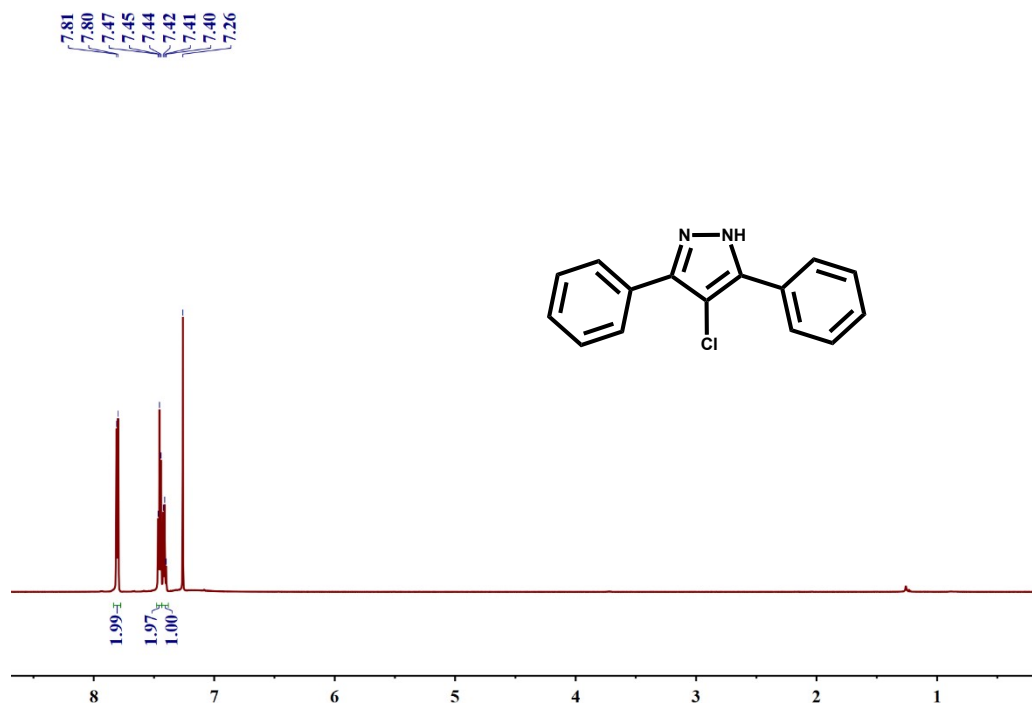

$^{13}\text{C}$  NMR ( $\text{CDCl}_3$ , 101 MHz)

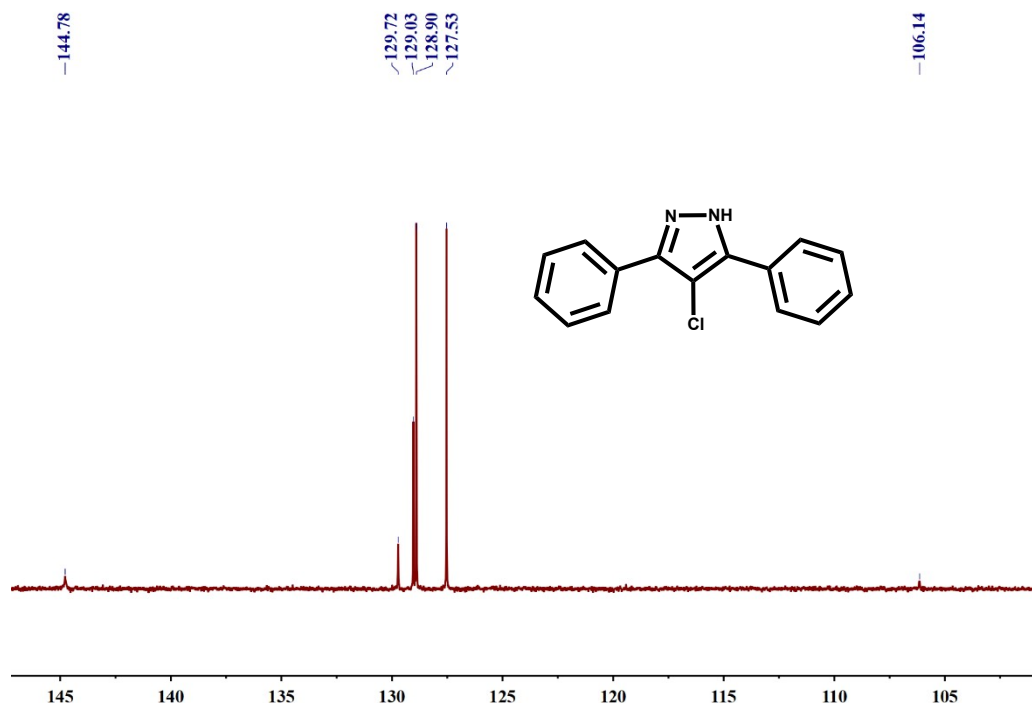

# $^1\text{H}$ NMR and $^{13}\text{C}$ NMR Spectra of Products

## 4-methyl-1,3-dioxolan-2-one

$^1\text{H}$  NMR ( $\text{CDCl}_3$ , 400 MHz)

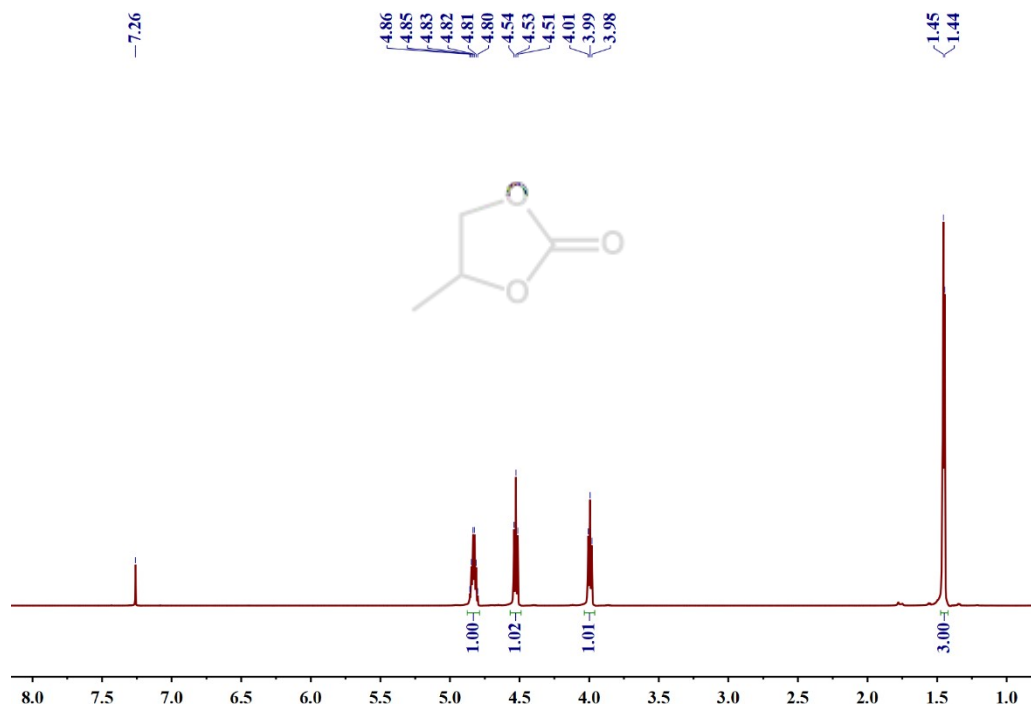

$^{13}\text{C}$  NMR ( $\text{CDCl}_3$ , 101 MHz)

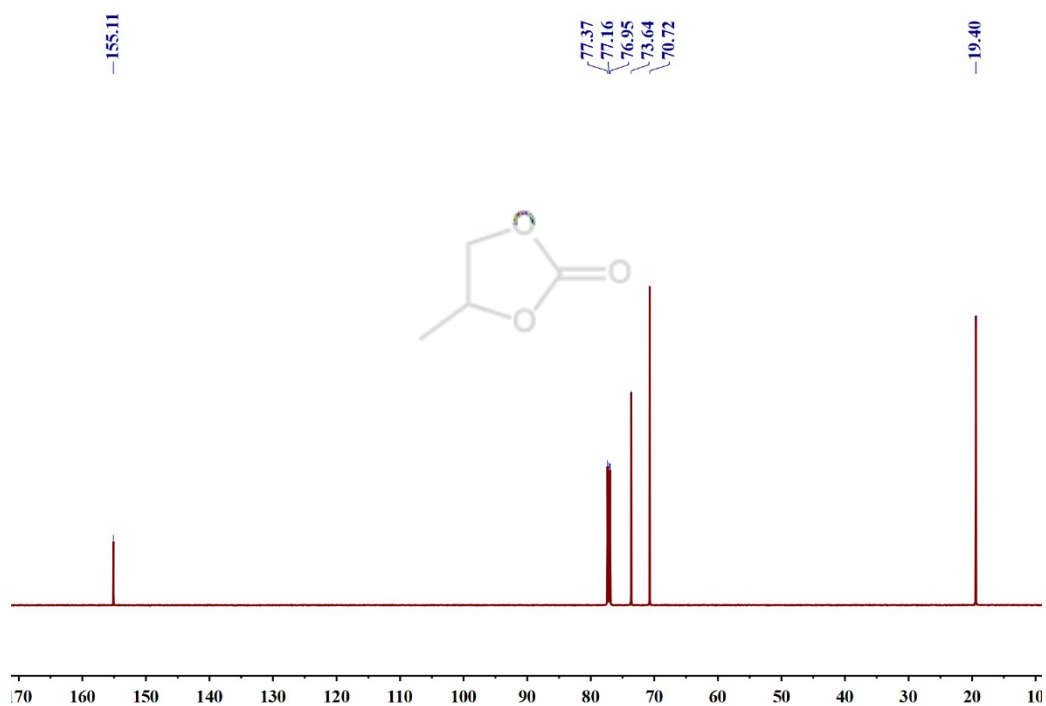

**4-(chloromethyl)-1,3-dioxolan-2-one**  
**<sup>1</sup>H NMR (CDCl<sub>3</sub>, 300 MHz)**

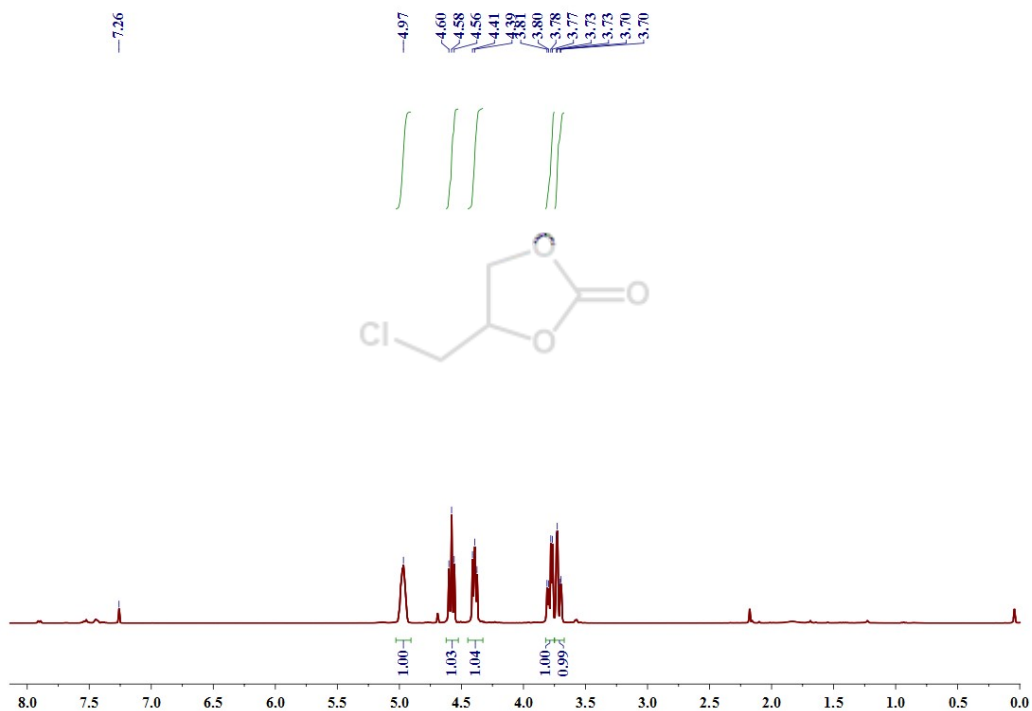

**<sup>13</sup>C NMR (CDCl<sub>3</sub>, 75 MHz)**

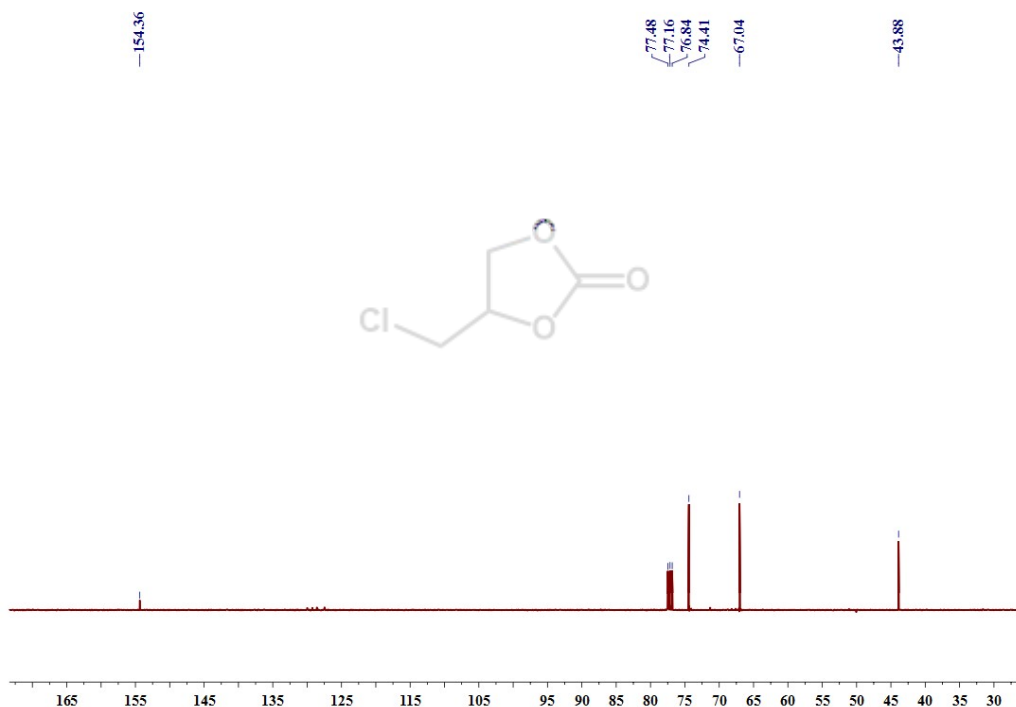



# 4-phenyl-1,3-dioxolan-2-one

$^1\text{H}$  NMR ( $\text{CDCl}_3$ , 300 MHz)

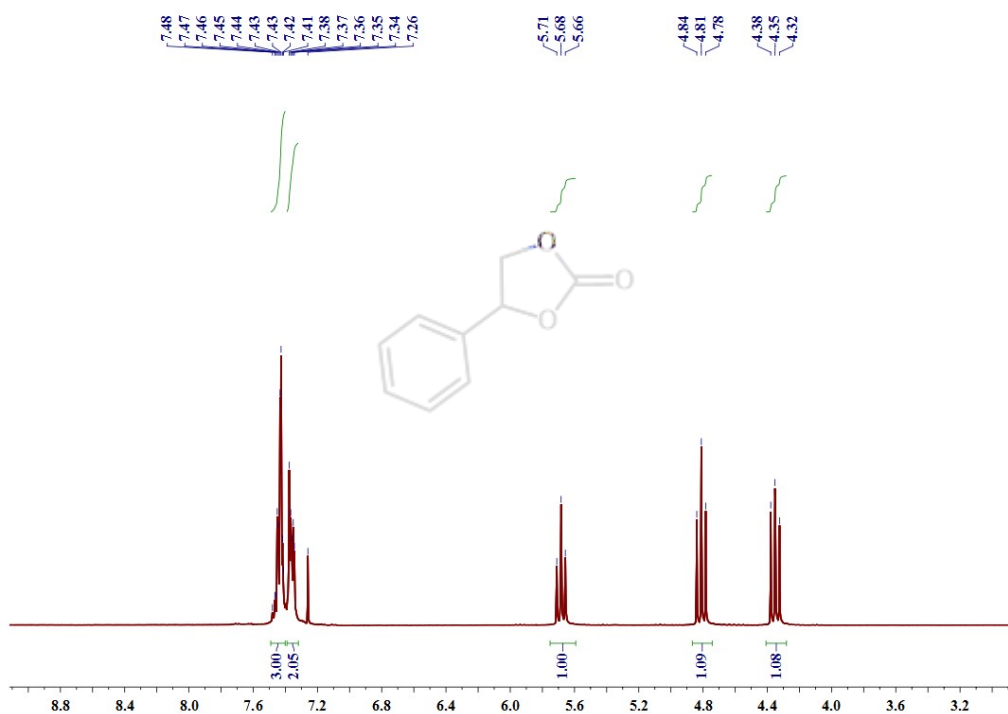

$^{13}\text{C}$  NMR ( $\text{CDCl}_3$ , 75 MHz)

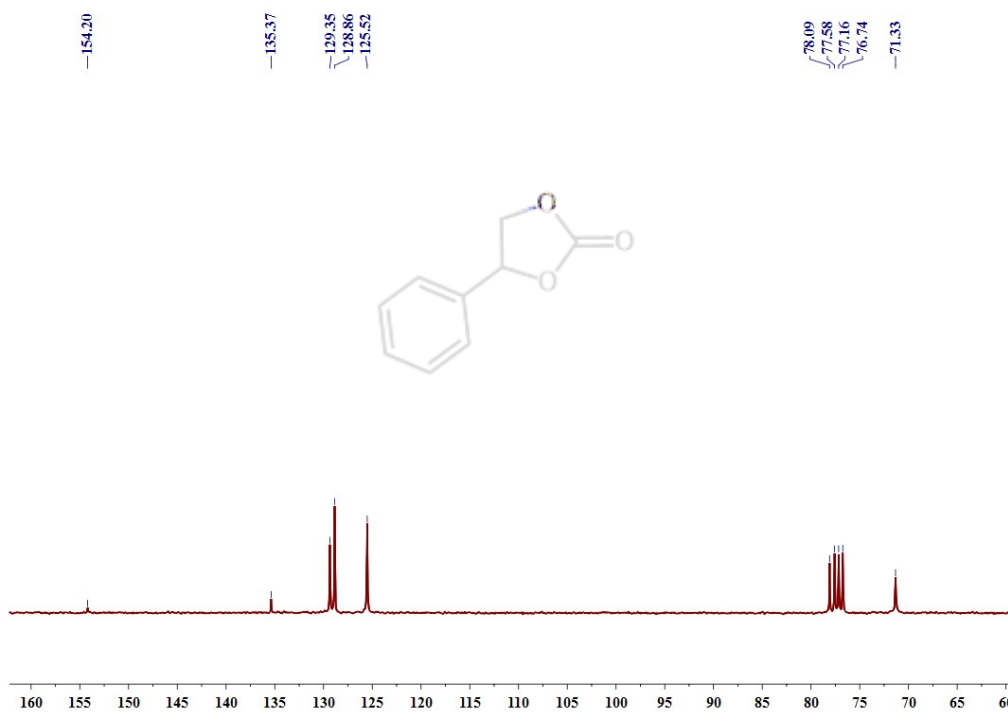

# 4-(phoxymethyl)-1,3-dioxolan-2-one

$^1\text{H}$  NMR ( $\text{CDCl}_3$ , 300 MHz)

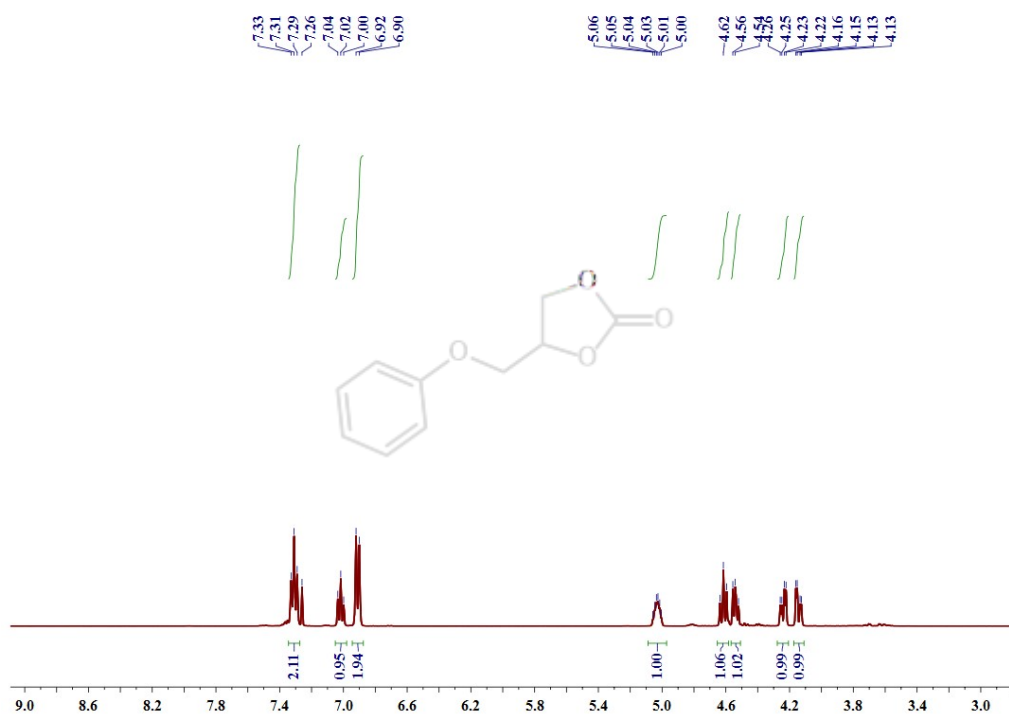

$^{13}\text{C}$  NMR ( $\text{CDCl}_3$ , 75 MHz)

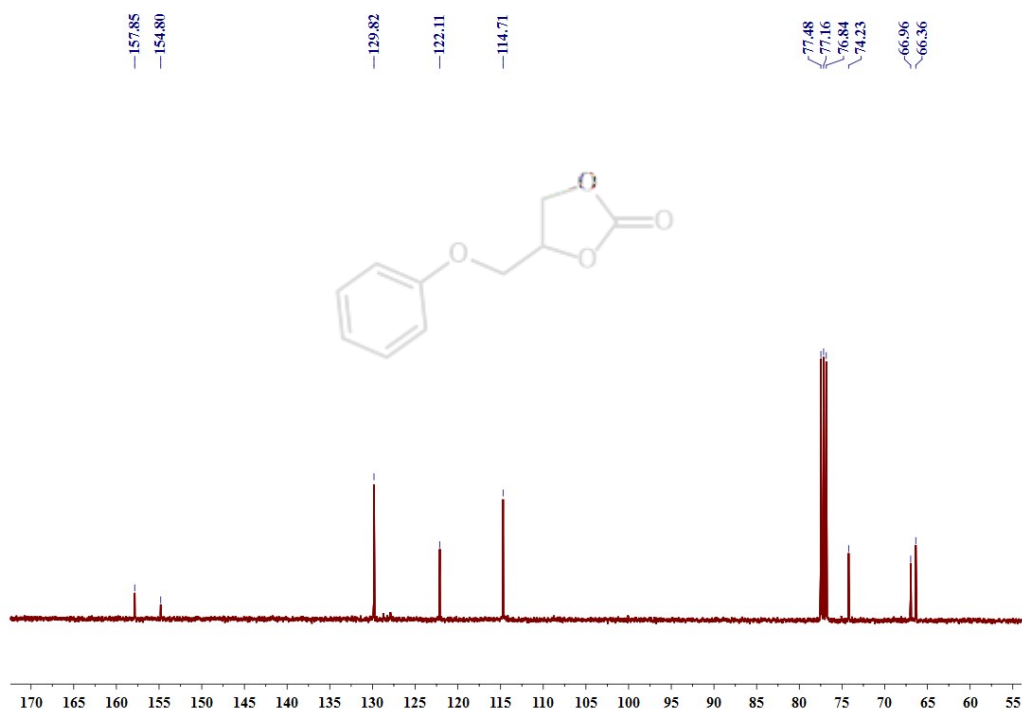

# 4-((benzyloxy)methyl)-1,3-dioxolan-2-one

$^1\text{H}$  NMR (300 MHz,  $\text{CDCl}_3$ )

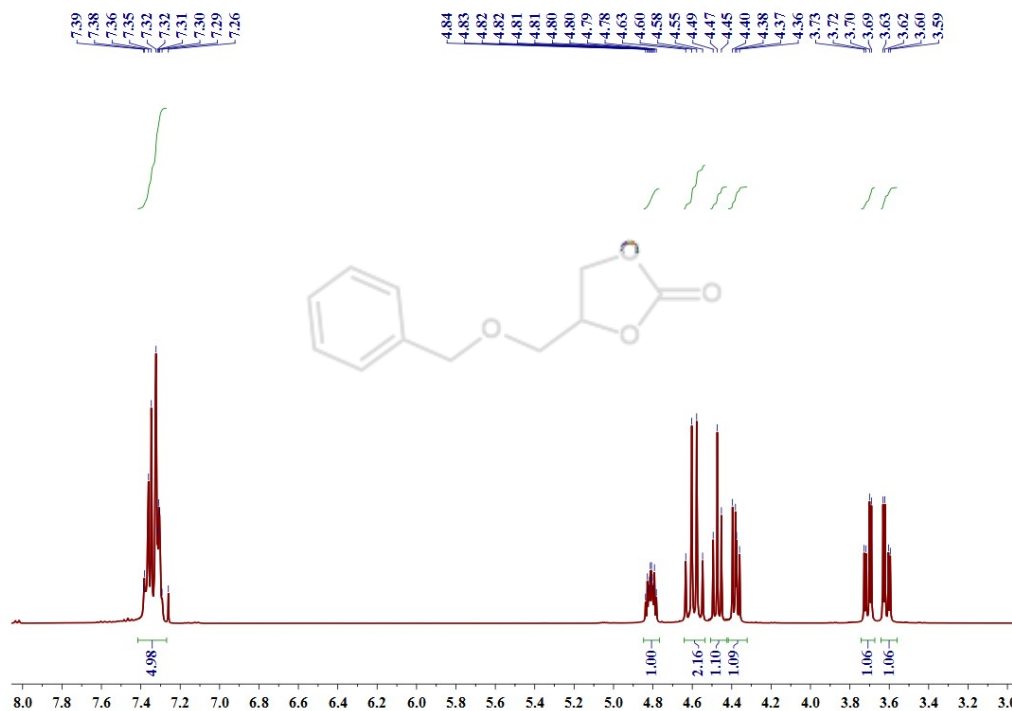

$^{13}\text{C}$  NMR (75 MHz,  $\text{CDCl}_3$ )

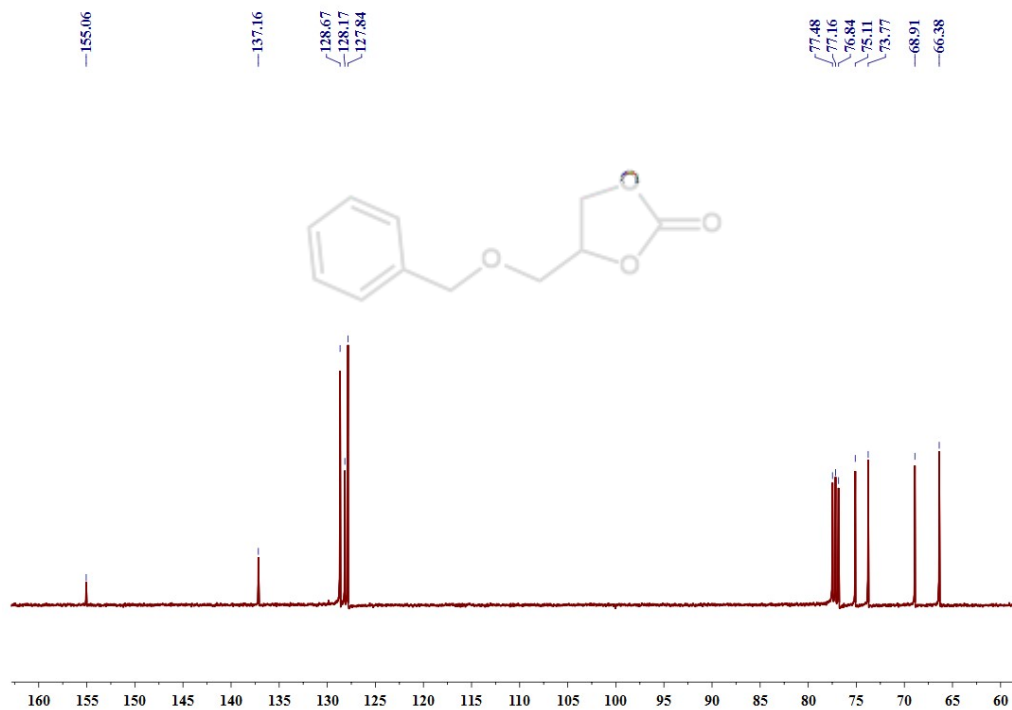

**4-((naphthalen-1-yloxy)methyl)-1,3-dioxolan-2-one**  
**<sup>1</sup>H NMR (CDCl<sub>3</sub>, 400 MHz)**

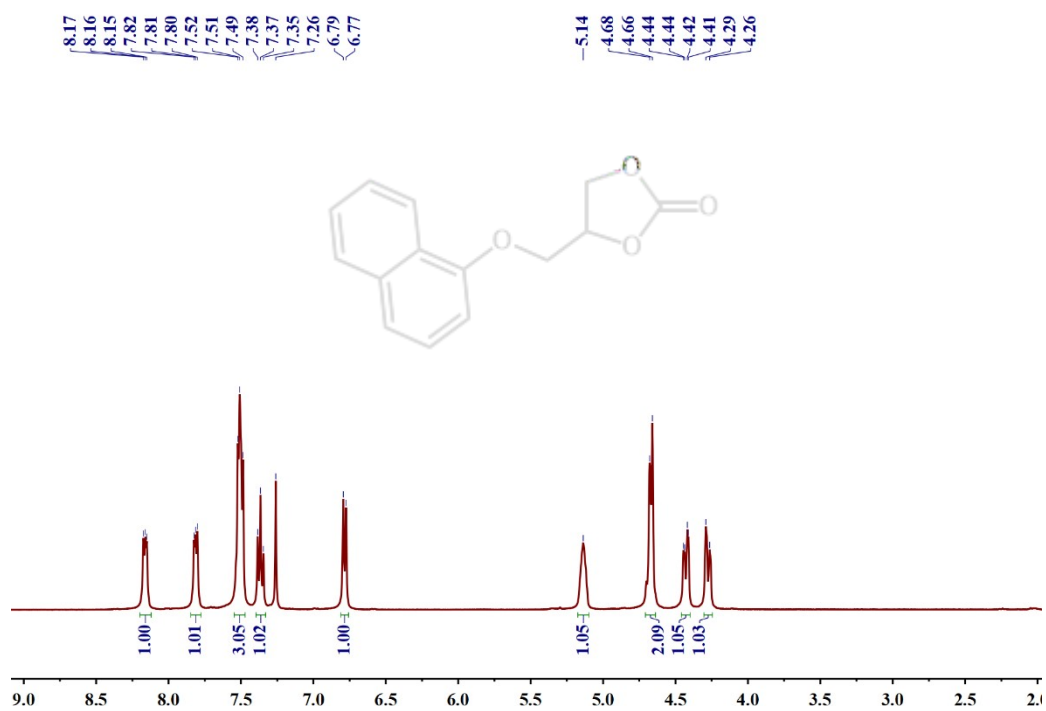

**<sup>13</sup>C NMR (CDCl<sub>3</sub>, 101 MHz)**

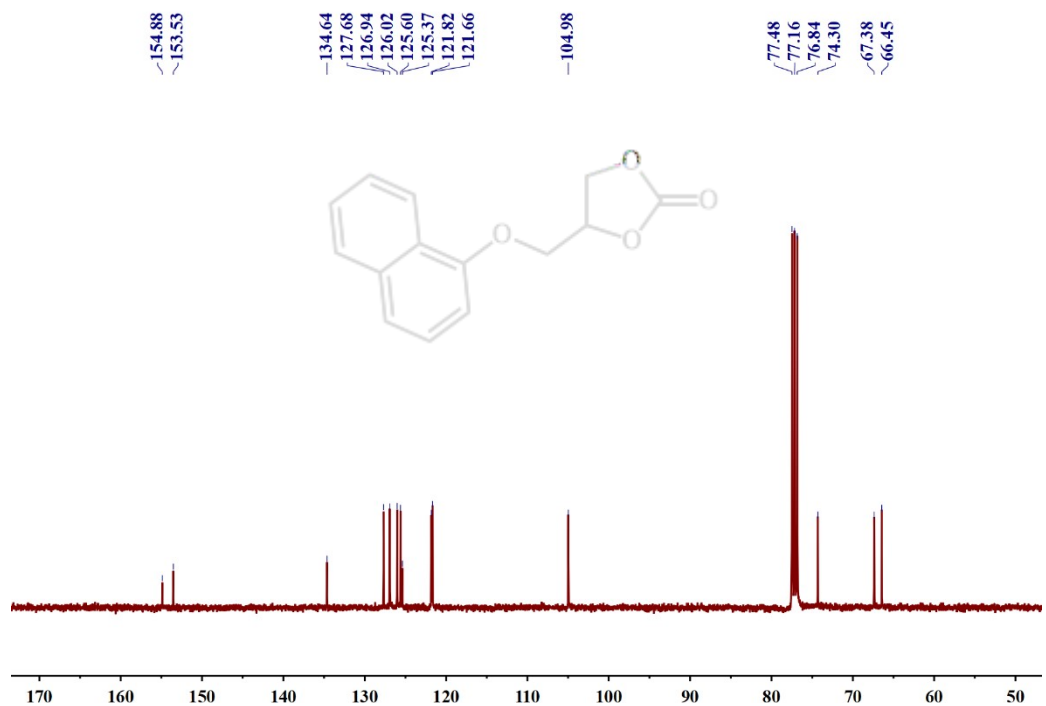

Hexahydrobenzo[*d*][1,3]dioxol-2-one  
<sup>1</sup>H NMR (CDCl<sub>3</sub>, 400 MHz)

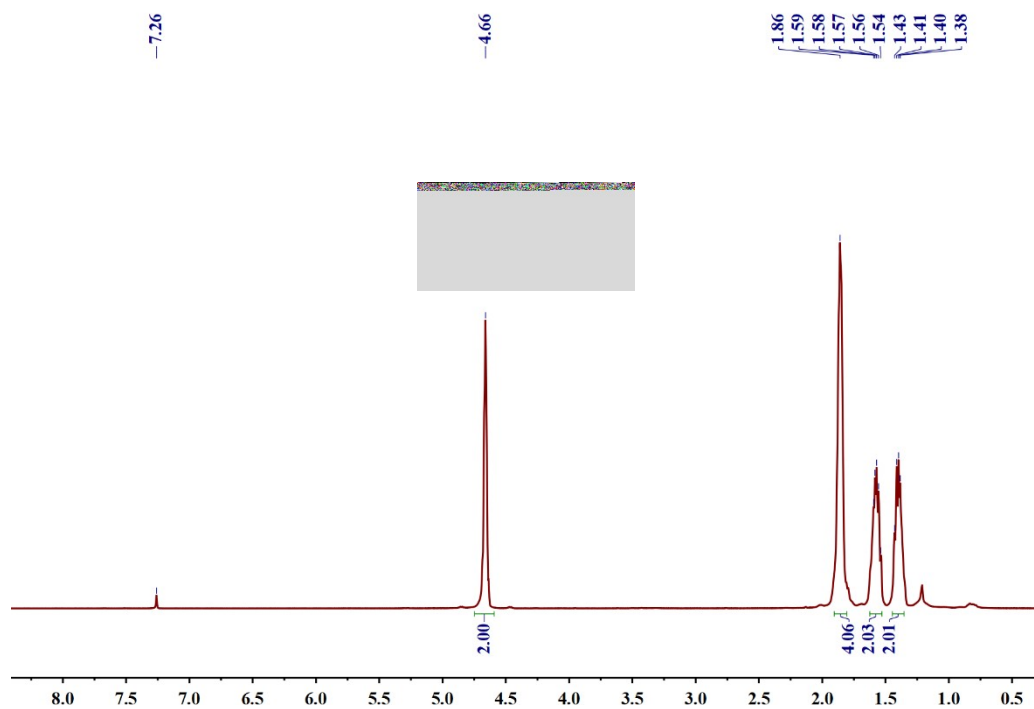

<sup>13</sup>C NMR (CDCl<sub>3</sub>, 101 MHz)

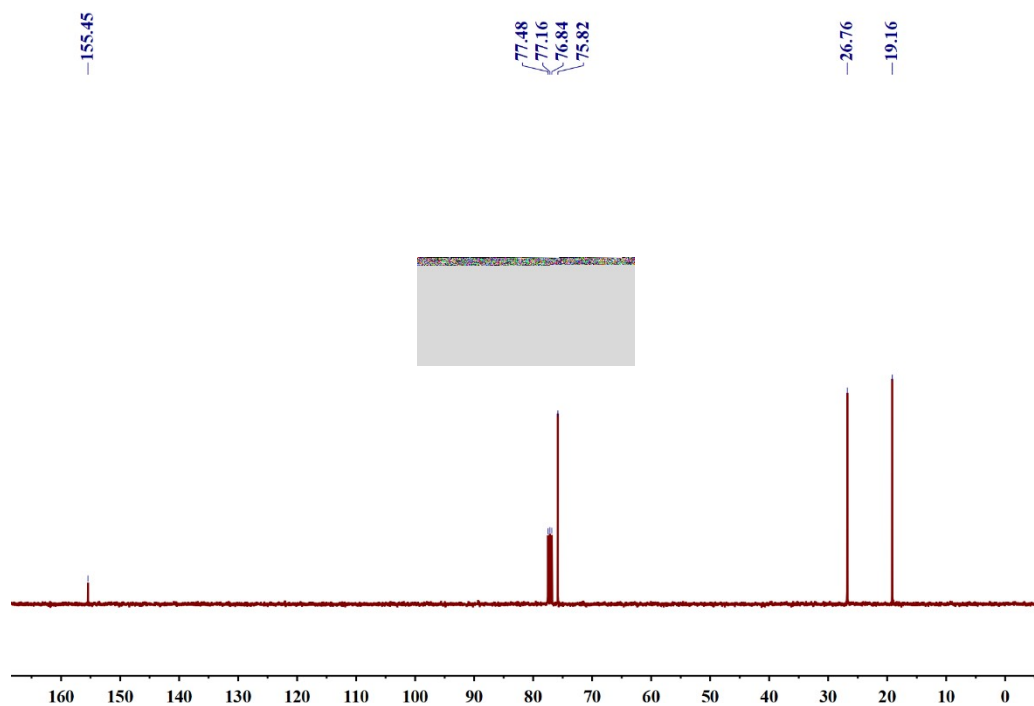

## Reference

- 1 J. Ackermann, F. Meyer, E. Kaifer and H. Pritzkow, *Chem. Eur. J.*, 2002, **8**, 247–258.
- 2 W. A. A. Isawi, M. Zeller and G. Mezei, *Cryst. Growth Des.*, 2022, **22**, 1398–1411.
- 3 S. K. Dey, T. S. M. Abedin, L. N. Dawe, S. S. Tandon, J. L. Collins, L. K. Thompson, A. V. Postnikov, M. S. Alam and Paul Müller, *Inorg. Chem.*, 2007, **46**, 7767–7781.
- 4 C. R. Murdock and D. M. Jenkins, *J. Am. Chem. Soc.*, 2014, **136**, 10983–10988.
- 5 J. Ying, C. Sun, L. Jin, A. Tian and X. Wang, *CrystEngComm*, 2021, **23**, 5385–5396.
- 6 A. B. Lysenko, O. A. Bondar, G. A. Senchyk, E. B. Rusanov, M. Srebro-Hooper, J. Hooper, K. Prsa, K. W. Krämer, S. Decurtins, O. Waldmann and S.-X. Liu, *Inorg. Chem.*, 2018, **57**, 6076–6083
- 7 M. K. Melvin, B. W. Skelton, P. K. Eggers and C. L. Raston, *CrystEngComm*, 2022, **24**, 57–69.
- 8 E.-C. Yang, Z.-Y. Liu, S.-H. Chen, Y.-H. Su, Y.-Y. Zhang and X.-J. Zhao, *Dalton Trans.*, 2015, **44**, 3190–3199.
- 9 Y. Zhou, H. Chen, X. Gu and X. Bian, *J. Mol. Struct.*, 2022, **1254**, 132324.
- 10 J.-H. Chen, C.-H. Deng, S. Fang, J.-G. Ma and P. Cheng, *Green. Chem.*, 2018, **20**, 989–996.
- 11 S.-S. Yu, X.-H. Liu, J.-G. Ma, Z. Niu and P. Cheng, *J. CO<sub>2</sub> Util.*, 2016, **14**, 122–125.
- 12 F. Zhou, S.-L. Xie, X.-T. Gao, R. Zhang, C.-H. Wang, G.-Q. Yin and J. Zhou, *Green. Chem.*, 2017, **19**, 3908–3915.
- 13 M. Liu, X. Li, X. Lin, L. Liang, X. Gao and J. Sun, *J. Mol. Catal. A: Chem.*, 2016, **412**, 20–26.
- 14 F. Cruz-Martinez, J. Martinez, M. A. Gaona, J. Fernandez-Baeza, L. F. Sanchez-Barba, A. M. Rodriguez, J. A. Castro-Osma, A. Otero and A. Lara-Sanchez, *ACS Sustainable Chem. Eng.*, 2018, **6**, 5322–5332.
- 15 N. H. Kim, E. Y. Seong, J. H. Kim, S. H. Lee, K. H. Ahn and E. J. Kang, *J. CO<sub>2</sub> Util.*, 2019, **34**, 516–521.
- 16 Y.-L. Hu, M. Lu and X.-L. Yang, *RSC Adv.*, 2015, **5**, 67886–67891.
- 17 J. Martínez, J. Fernandez-Baeza, L. F. Sánchez-Barba, J.-A. Castro-Osma, A. Lara-Sánchez and A. Otero, *ChemSusChem*, 2017, **10**, 2886–2890.
- 18 J. Sun, W. Cheng, Z. Yang, J. Wang, T. Xu, J. Xin and S. Zhang, *Green Chem*, 2014, **16**, 3071–3078.
